# Supplementary material for: Monitoring and modelling marine zooplankton in a changing climate
Source: PubMed Central journal article supplement (PMC9895051; doi:10.1038/s41467-023-36241-5), 2023-02-02
Supplement: 41467_2023_36241_MOESM1_ESM.pdf [file 41467_2023_36241_MOESM1_ESM.pdf]

## **Description of Additional Supplementary Files**

File Name: Supplementary Data 1

Description: Information on long-term zooplankton monitoring programs in the global ocean
